# Supplementary material for: πSPIM: high NA high resolution isotropic light-sheet imaging in cell culture dishes
Source: PubMed Central journal article supplement (PMC5020645; doi:10.1038/srep32880), 2016-09-13
Supplement: srep32880-s1.pdf [file srep32880-s1.pdf]

## Supplementary Information for

# $\pi$ SPIM: high NA high resolution isotropic light sheet imaging in cell culture dishes

Patrick Theer<sup>1,2</sup>, Denitsa Dragneva<sup>1</sup> & Michael Knop<sup>1,2,\*</sup>

<sup>1</sup> Zentrum für Molekulare Biologie der Universität Heidelberg (ZMBH), University of Heidelberg, Im Neuenheimer Feld 282, 69120 Heidelberg, Germany

<sup>2</sup> Deutsches Krebsforschungszentrum (DKFZ), Im Neuenheimer Feld 280, 69120 Heidelberg, Germany

\* corresponding author: [m.knop@zmbh.uni-heidelberg.de](mailto:m.knop@zmbh.uni-heidelberg.de)

### Supplementary Movies

**Supplementary Movie 1** | *In toto* imaging of endocytosis in yeast.  $\pi$ SPIM dual-channel time-lapse movie of endocytosis in yeast capturing all endocytic events for about 1 min at a speed of  $\sim 2$  stacks/s (567 ms interval and 104x104x100 nm voxels) and a roughly isotropic resolution of about 300 nm. Sla1-EGFP and Abp1-mCherry were used (see Results and Discussion).

**Supplementary Movie 2** | Long term *in toto* imaging of endocytosis in yeast.  $\pi$ SPIM dual-channel time-lapse movie of endocytosis in yeast capturing all endocytic events for about 7 min at a speed of  $\sim 2$  stacks/s (435 ms interval and 104x104x500 nm voxels). Sla1-EGFP and Abp1-mCherry were used (see Ref<sup>15</sup> in main manuscript).

**Supplementary Movie 3** | Microtubule dynamics in HEK293T cells.  $\pi$ SPIM dual-channel time-lapse movie (700 ms interval) of HEK293T cells.  $\pi$ SPIM dual-channel time-lapse movie (100 stacks at 700 ms interval) of HEK293T cells. The maximum intensity projection of 35 planes (500nm spacing) through a HEK293T cell shows microtubules (in green) by visualizing the plus-end-binding protein EB3 (EB3-GFP) relative to the ER marker (CD3 $\delta$ -mCherry).

**Supplementary Movie 4** | Dynamics of filopodia in HeLa cells.  $\pi$ SPIM dual-channel 30 minute time-lapse movie (400 stacks at 4.5 s interval) of HeLa cells with stable integration of lifeact-GFP and H2B-mCherry. Maximum intensity projection of 25 planes through a HeLa cell expressing lifeact-GFP shows the dynamics of its filopodia.
